# Supplementary material for: Co-expression network analysis of duplicate genes in maize (Zea mays L.) reveals no subgenome bias
Source: PubMed Central journal article supplement (PMC5097351; doi:10.1186/s12864-016-3194-0), 2016-11-04
Supplement: 12864_2016_3194_MOESM5_ESM.pdf [file 12864_2016_3194_MOESM5_ESM.pdf]

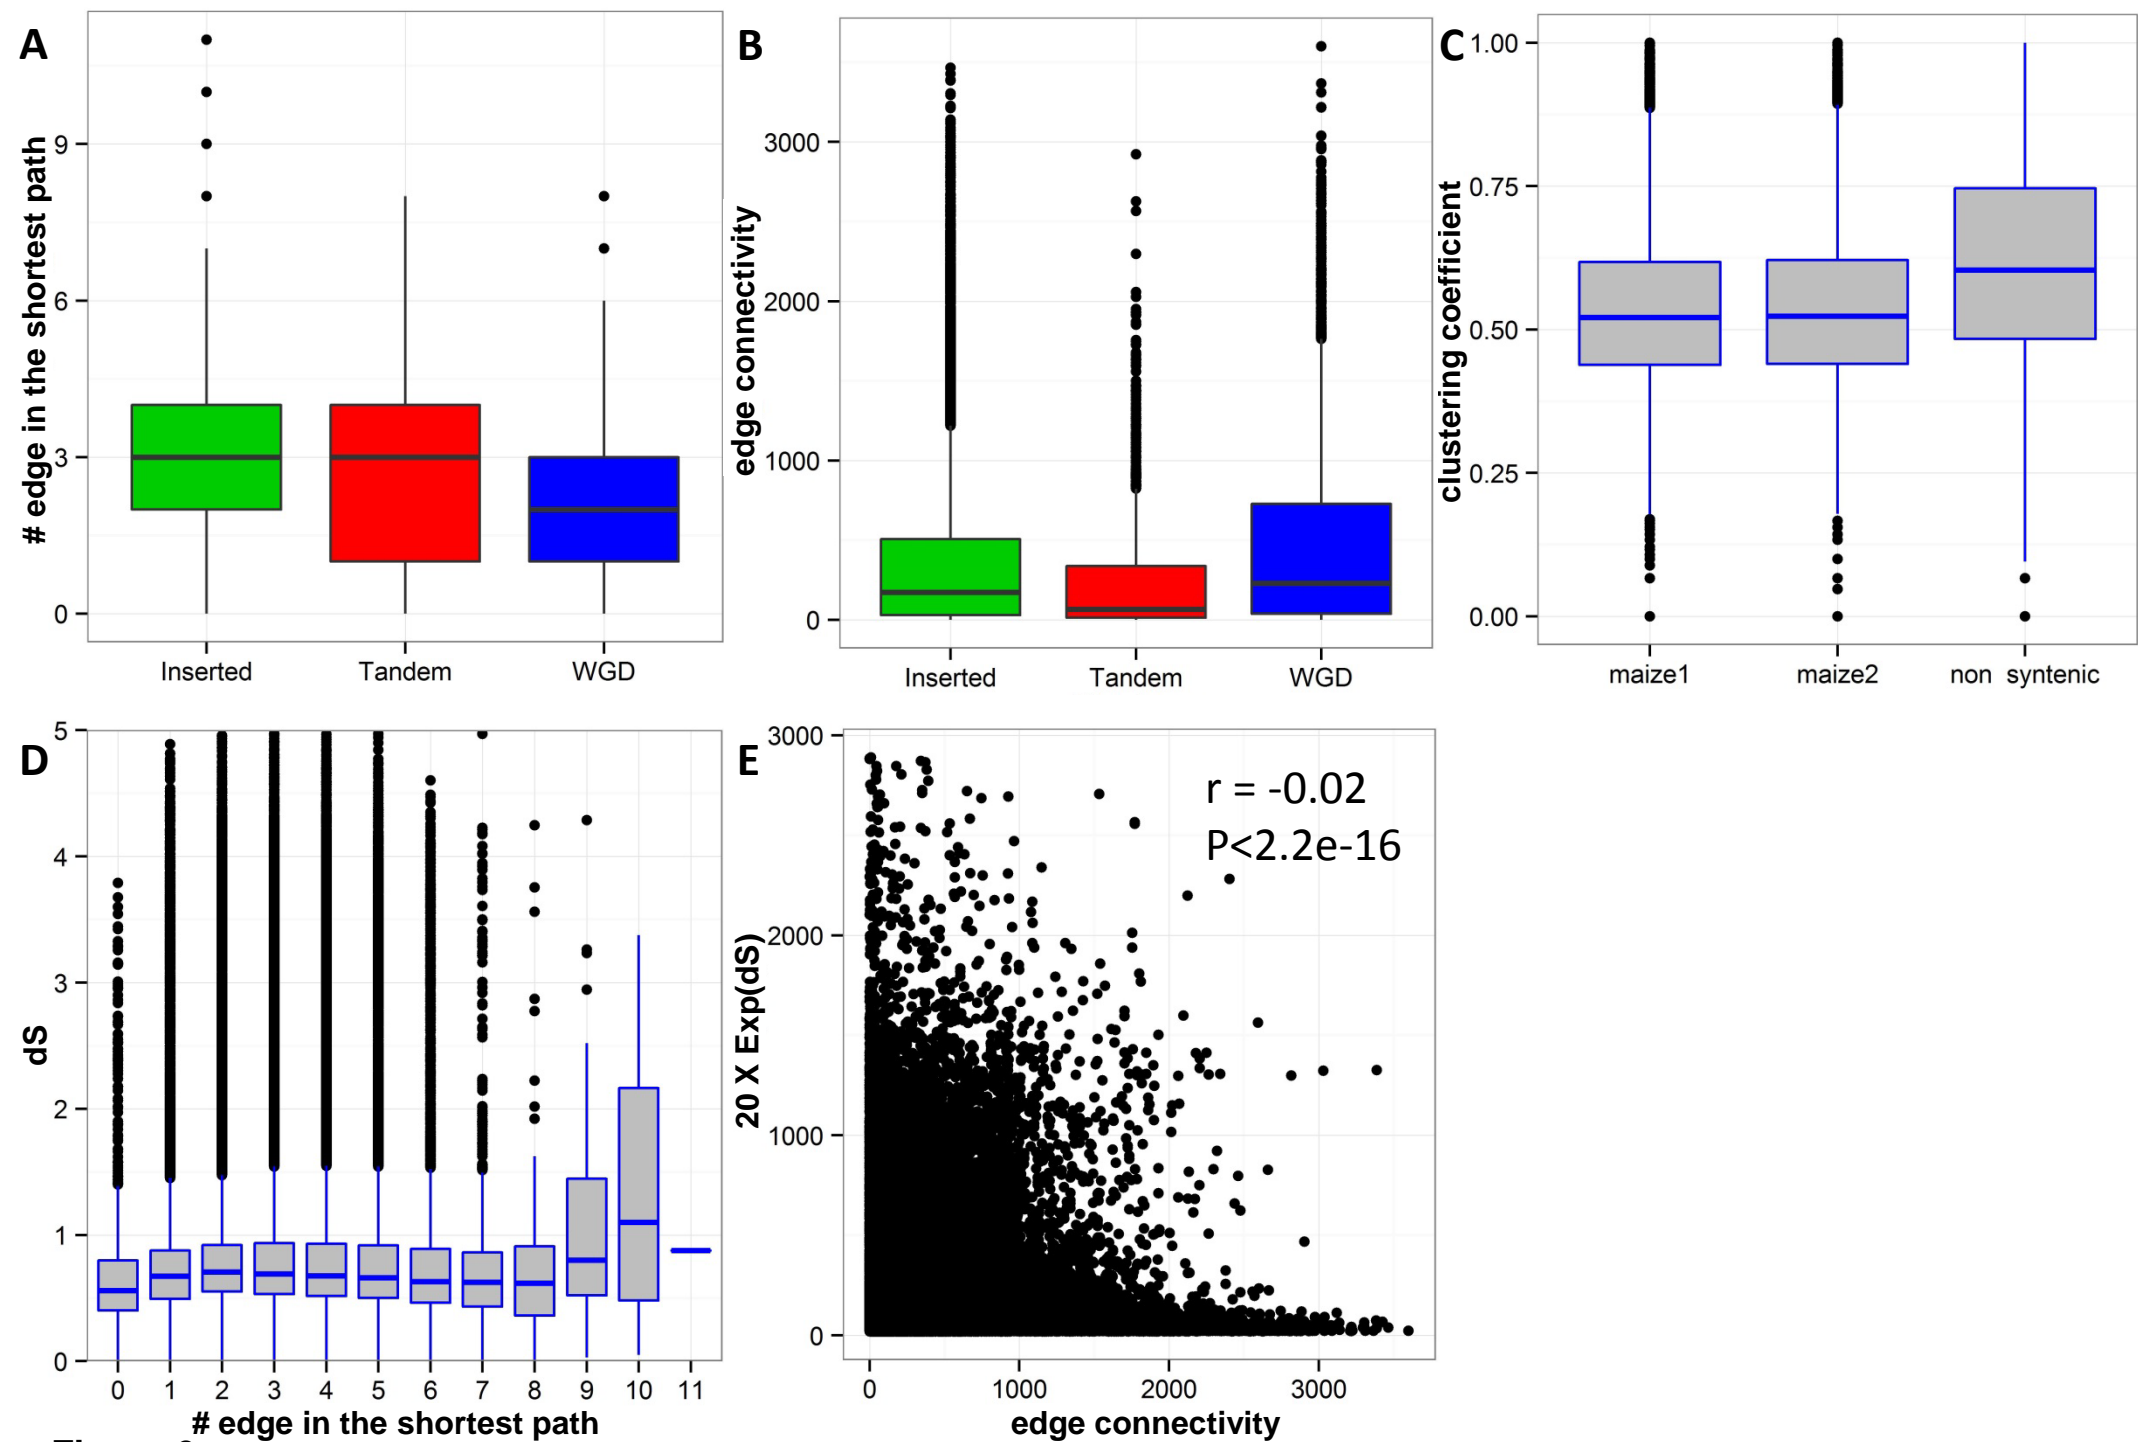

Figure 6
